# Supplementary material for: The prognostic value of DNA damage level in peripheral blood lymphocytes of chemotherapy-naïve patients with germ cell cancer
Source: PubMed Central journal article supplement (PMC5342793; doi:10.18632/oncotarget.12515), 2016-10-07
Supplement: oncotarget-07-75996-s001.pdf [file oncotarget-07-75996-s001.pdf]

## **The prognostic value of DNA damage level in peripheral blood lymphocytes of chemotherapy-naïve patients with germ cell cancer**

### **SUPPLEMENTARY TABLES**

#### **Supplementary Table S1: Clinical characteristics of study patients (n=59)**

See Supplementary File 1

Supplementary Table S2: Distribution of histological subtypes among GCT patients (n=59)

|     |    | Histological subtype* |     |     | Number of patients |
|-----|----|-----------------------|-----|-----|--------------------|
| SEM |    |                       |     |     | 17                 |
|     | EC |                       |     |     | 5                  |
|     | EC | YST                   |     |     | 4                  |
|     | EC | YST                   |     | TER | 5                  |
| SEM | EC |                       |     |     | 3                  |
|     |    | YST                   |     |     | 2                  |
|     |    |                       | CHC |     | 3                  |
|     | EC |                       |     | TER | 2                  |
| SEM |    | YST                   |     |     | 2                  |
| SEM | EC | YST                   |     |     | 2                  |
| SEM | EC |                       |     | TER | 2                  |
| EC  |    | YST                   | CHC | TER | 2                  |
|     |    |                       |     | TER | 1                  |
|     |    | YST                   |     | TER | 1                  |
|     |    |                       | CHC | TER | 1                  |
|     | EC |                       | CHC | TER | 1                  |
| SEM |    | YST                   |     | TER | 1                  |
| SEM |    | YST                   | CHC |     | 1                  |
| SEM | EC | YST                   |     | TER | 1                  |
| SEM | EC | YST                   | CHC | TER | 1                  |

**Abbreviations:** EC, embryonal carcinoma; SEM, seminoma; YST, yolk sac tumour; CHC, choriocarcinoma; TER, teratoma

\* Complete histology data are not available for 2 patients
